# Supplementary material
Source: publisher site journal article supplement (https://www.spandidos-publications.com/8242/downloadSupplementary)
Supplement: Supplementary file 1 [file downloadSupplementary]

Table SI. Characteristics of datasets analyzed in R2 Genomics Platform (<https://r2.amc.nl>)

| Variable  | Kocak | SEQC | Oberthur |
|-----------|-------|------|----------|
| N         | 649   | 498  | 251      |
| Stage 1*  | 153   | 121  | 68       |
| Stage 2*  | 113   | 78   | 46       |
| Stage 3*  | 91    | 63   | 39       |
| Stage 4*  | 214   | 183  | 67       |
| Stage 4S* | 78    | 53   | 31       |
| Female    | 268** | 211  | 105      |
| Male      | 344** | 287  | 146      |

\* INSS stages, \*\*37 sex was not known. INSS, International Neuroblastoma Staging System SEQC, sequencing quality control consortium (neuroblastoma dataset; <https://hgserver1.amc.nl/cgi-bin/r2/main.cgi> R2 internal identifier: ps\_avgpres\_gse62564geo498\_seqcnb1)
